# Supplementary material for: A nano-molar level fluorogenic and oxidation state-selective chromogenic dual reversible chemosensor for multiple targets, Cu2+/S2−and Fe3+/F−ions
Source: Royal Society of Chemistry journal article supplement (doi:10.1039/d0nj02777d), 2020-01-01
Supplement: d0nj02777d1.pdf [file d0nj02777d1.pdf]

## Supplementary Information

### Nano-Molar Level Fluorogenic and Oxidation-State Selective Chromogenic Dual Reversible Chemosensor for Multiple Targets $\text{Cu}^{2+}/\text{S}^{2-}$ and $\text{Fe}^{3+}/\text{F}^-$ ion

Sayed Muktar Hossain, Gaurab Kumar Dam, Sagarika Mishra and Akhilesh Kumar Singh\*

School of Basic Sciences, Indian Institute of Technology Bhubaneswar, Bhubaneswar, 752050, India. E-mail: [aksingh@iitbbs.ac.in](mailto:aksingh@iitbbs.ac.in)

#### Contents:

|                                                                                                                                                                                                           |
|-----------------------------------------------------------------------------------------------------------------------------------------------------------------------------------------------------------|
| Fig. S1 ESI-MS of L in methanol.                                                                                                                                                                          |
| Fig. S2 $^1\text{H}$ NMR (400 MHz) of L in $\text{DMSO-d}_6$ .                                                                                                                                            |
| Fig. S3 $^{13}\text{C}$ NMR (100 MHz) of L in $\text{DMSO-d}_6$ .                                                                                                                                         |
| Fig. S4 FT-IR spectra of L in KBr pellet.                                                                                                                                                                 |
| Fig. S5 ESI-MS of $\text{Cu}^{\text{II}}\text{L}_2$ complex in MeOH.                                                                                                                                      |
| Fig. S6 FT-IR spectra of $\text{Cu}^{\text{II}}\text{L}_2$ complex in KBr pellet.                                                                                                                         |
| Fig. S7 ESI-MS of $\text{Fe}^{\text{III}}\text{L}_2$ complex in MeOH.                                                                                                                                     |
| Fig. S8 FT-IR spectra of $\text{Fe}^{\text{III}}\text{L}_2$ complex in KBr pellet.                                                                                                                        |
| Table S1 Bond lengths [ $\text{\AA}$ ] and angles [ $^\circ$ ] for $\text{CuL}_2$ Complex $[\text{CuL}_2](\text{ClO}_4)_2$ .                                                                              |
| Fig. S9 UV-Vis spectra of L, $\text{Cu}^{\text{II}}\text{L}_2$ and $\text{Fe}^{\text{III}}\text{L}_2$ complex (20 $\mu\text{M}$ each individually) in DMSO solvent.                                       |
| Fig. S10 Intra-molecular non-covalent interactions ( $\text{C-H}\cdots\pi$ and $\pi\cdots\pi$ ) present in $\text{Cu}^{\text{II}}\text{L}_2$ complex.                                                     |
| Fig. S11 Inter-molecular non-covalent interactions ( $\text{C-H}\cdots\pi$ and $\pi\cdots\pi$ ) present in $\text{Cu}^{\text{II}}\text{L}_2$ complex.                                                     |
| Fig. S12 Job's plot for the binding of L with $\text{Fe}^{3+}$ absorption intensity at 340 nm in MeOH was plotted as a function of the molar ratio $[\text{Fe}^{3+}] / ([\text{L}] + [\text{Fe}^{3+}])$ . |
| Fig. S13 Detection limit of L for the recognition of $\text{Cu}^{2+}$ ( $\lambda_{\text{ex}} = 340 \text{ nm}$ and $\lambda_{\text{em}} = 407 \text{ nm}$ ).                                              |

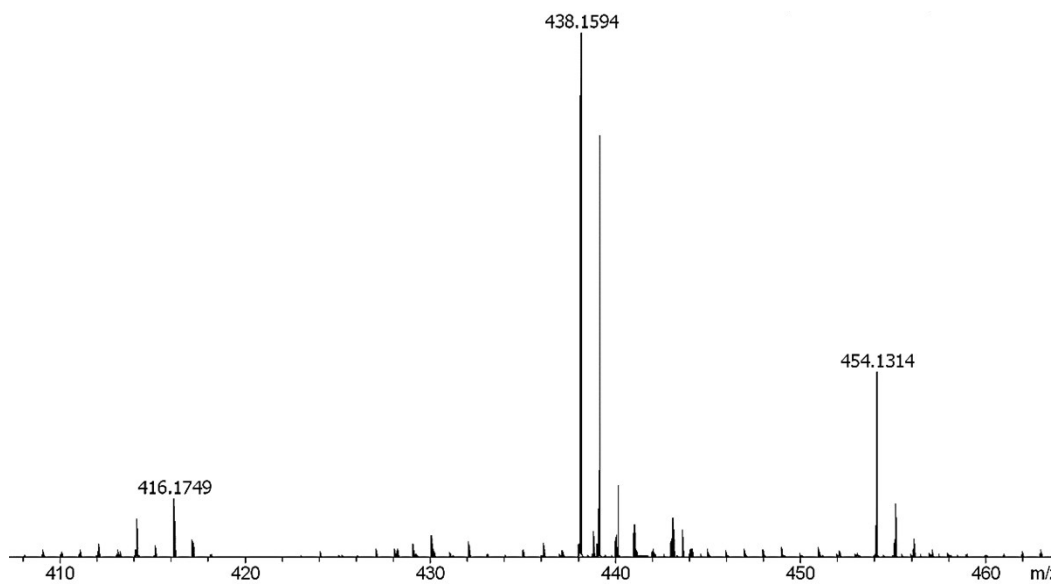

Fig. S1 ESI-MS of L in methanol.

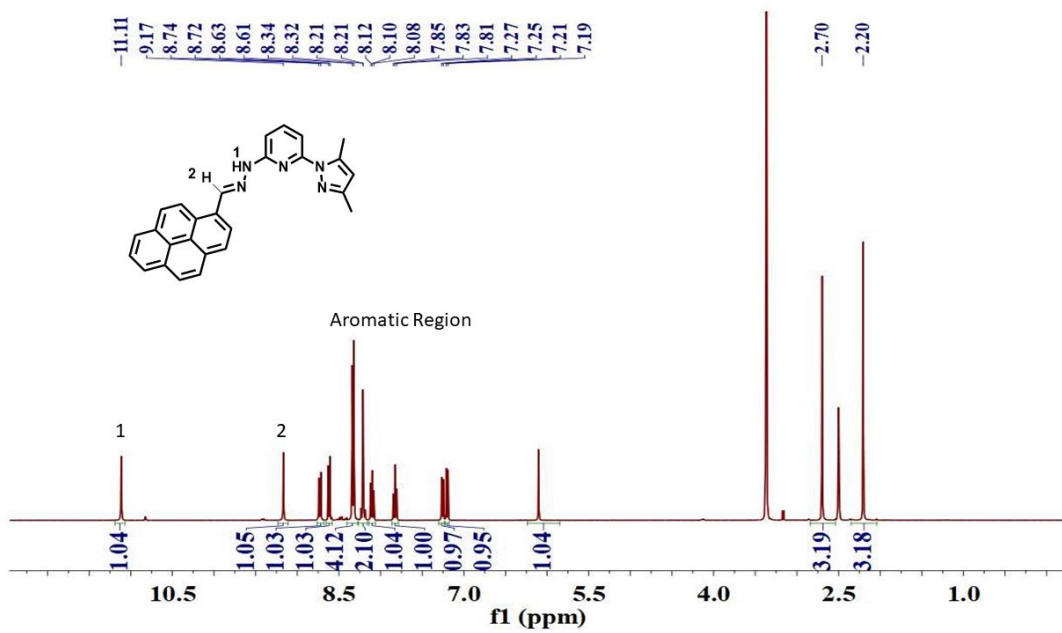

Fig. S2 <sup>1</sup>H NMR (400 MHz) of L in DMSO-d<sub>6</sub>.

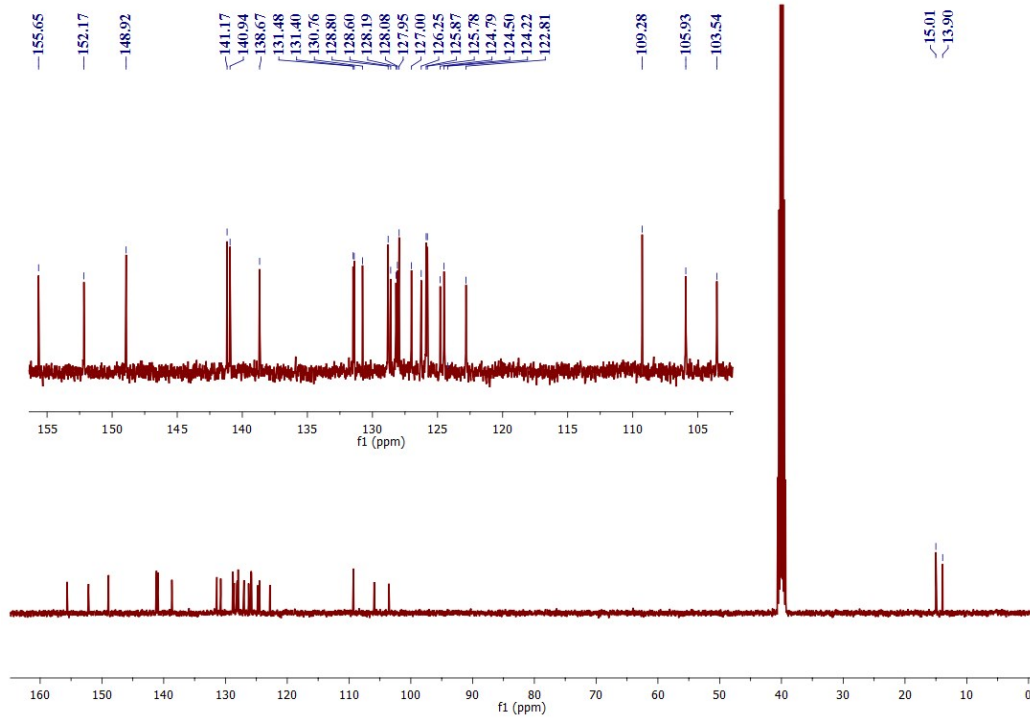

Fig. S3  $^{13}\text{C}$  NMR (100 MHz) of L in  $\text{DMSO-d}_6$ .

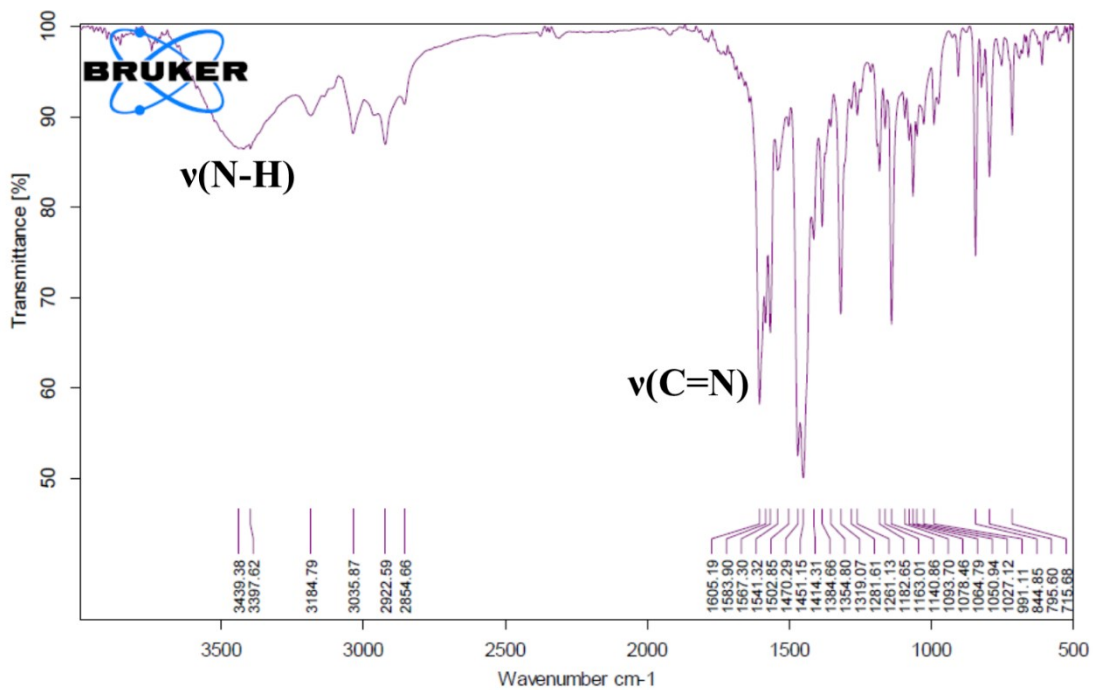

Fig. S4 FT-IR spectra of L in KBr pellet.

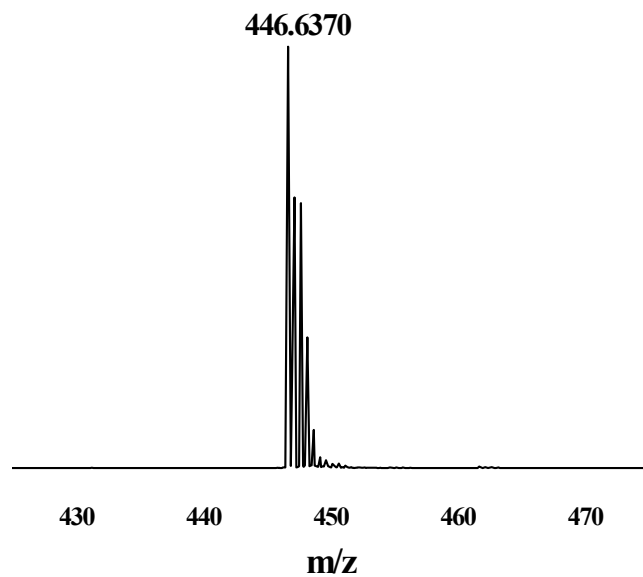

Fig. S5 ESI-MS of  $\text{Cu}^{\text{II}}\text{L}_2$  complex in MeOH.

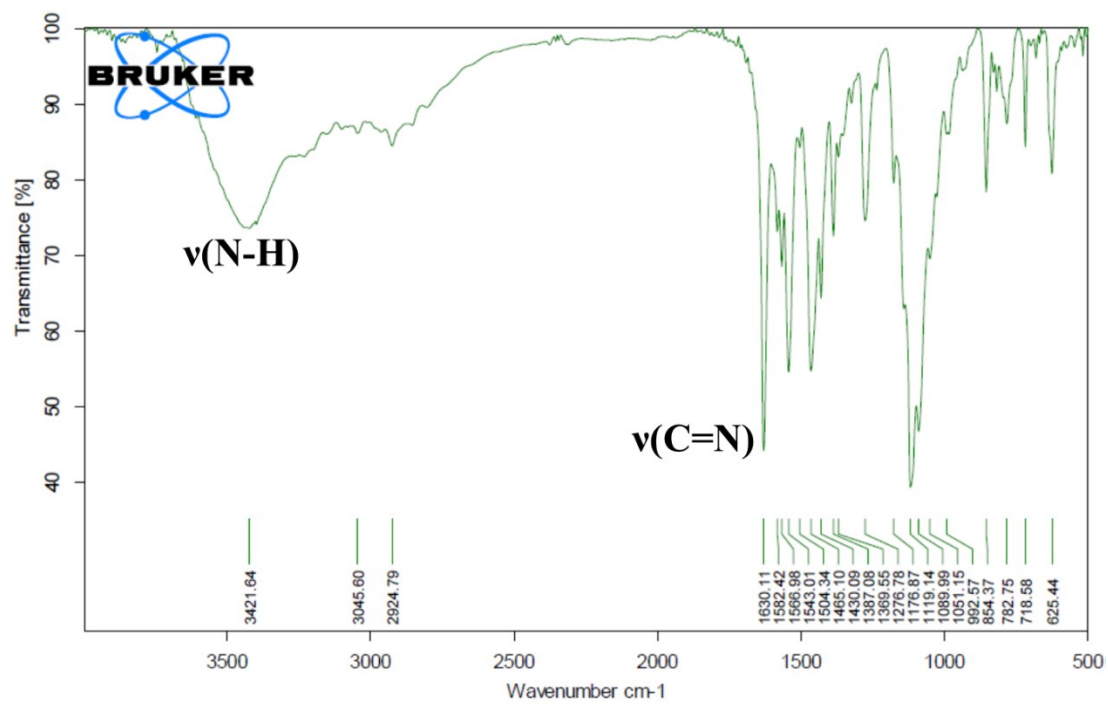

Fig. S6 FT-IR spectra of  $\text{Cu}^{\text{II}}\text{L}_2$  complex in KBr pellet.

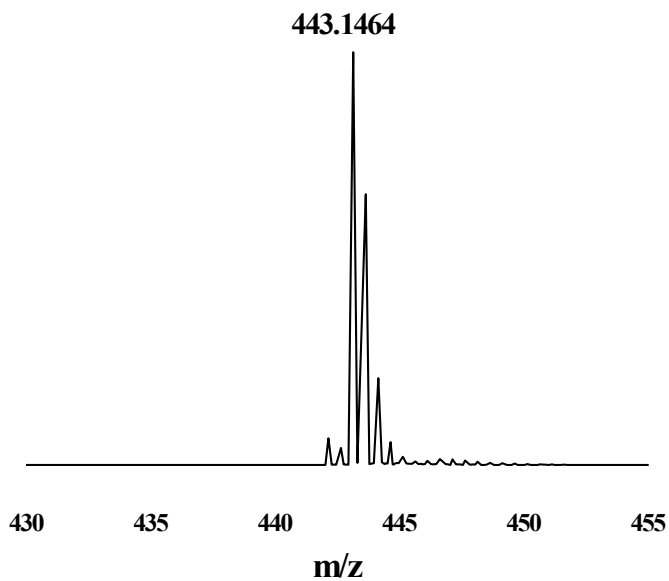

Fig. S7 ESI-MS of  $\text{Fe}^{\text{III}}\text{L}_2$  complex in MeOH.

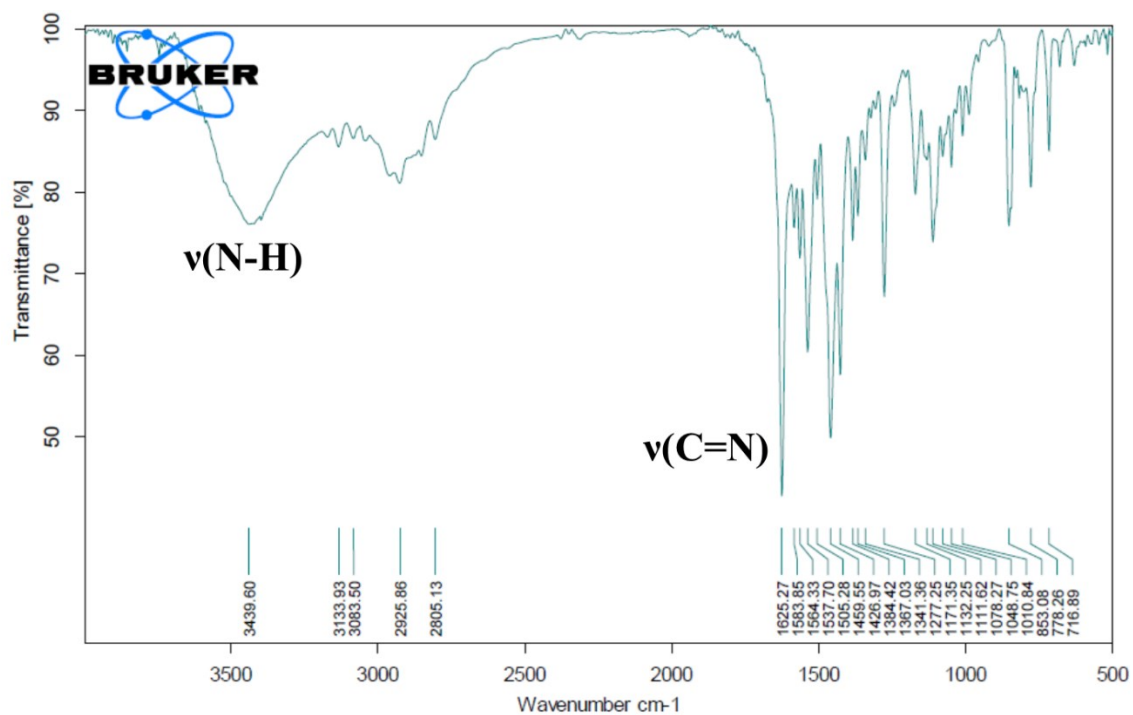

Fig. S8 FT-IR spectra of  $\text{Fe}^{\text{III}}\text{L}_2$  complex in KBr pellet.

**Table S1** Bond lengths [ $\text{\AA}$ ] and angles [ $^\circ$ ] for  $\text{CuL}_2$  Complex  $[\text{CuL}_2](\text{ClO}_4)_2$ .

|                  |            |
|------------------|------------|
| Cu(1)-N(8)       | 1.9511(18) |
| Cu(1)-N(3)       | 1.9660(17) |
| Cu(1)-N(6)       | 2.1147(18) |
| Cu(1)-N(1)       | 2.157(2)   |
| Cu(1)-N(10)      | 2.258(2)   |
| Cu(1)-N(5)       | 2.3022(19) |
|                  |            |
| N(8)-Cu(1)-N(3)  | 179.30(8)  |
| N(8)-Cu(1)-N(6)  | 78.10(7)   |
| N(3)-Cu(1)-N(6)  | 101.43(7)  |
| N(8)-Cu(1)-N(1)  | 103.32(8)  |
| N(3)-Cu(1)-N(1)  | 77.28(7)   |
| N(6)-Cu(1)-N(1)  | 102.92(8)  |
| N(8)-Cu(1)-N(10) | 76.18(7)   |
| N(3)-Cu(1)-N(10) | 104.23(7)  |
| N(6)-Cu(1)-N(10) | 153.77(7)  |
| N(1)-Cu(1)-N(10) | 88.00(8)   |
| N(8)-Cu(1)-N(5)  | 103.31(7)  |
| N(3)-Cu(1)-N(5)  | 76.12(7)   |
| N(6)-Cu(1)-N(5)  | 86.47(7)   |
| N(1)-Cu(1)-N(5)  | 153.06(7)  |
| N(10)-Cu(1)-N(5) | 94.46(8)   |

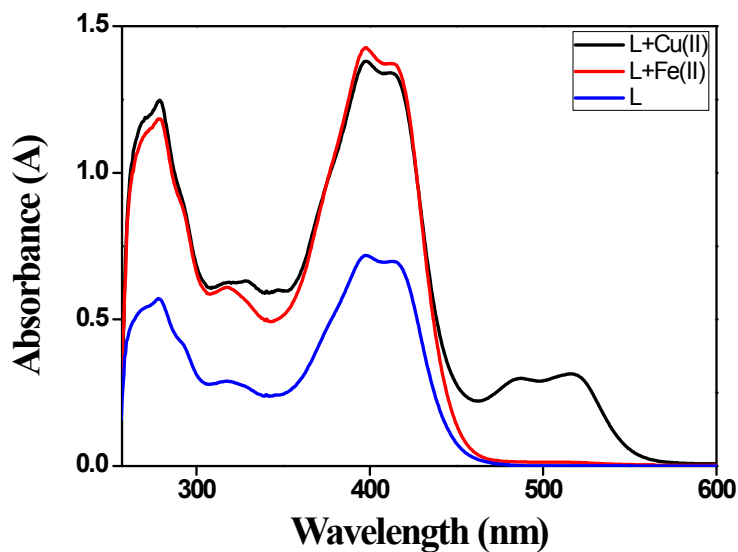

**Fig. S9** UV-Vis spectra of L,  $\text{Cu}^{\text{II}}\text{L}_2$  and  $\text{Fe}^{\text{III}}\text{L}_2$  complex ( $20 \mu\text{M}$  each individually) in DMSO solvent.

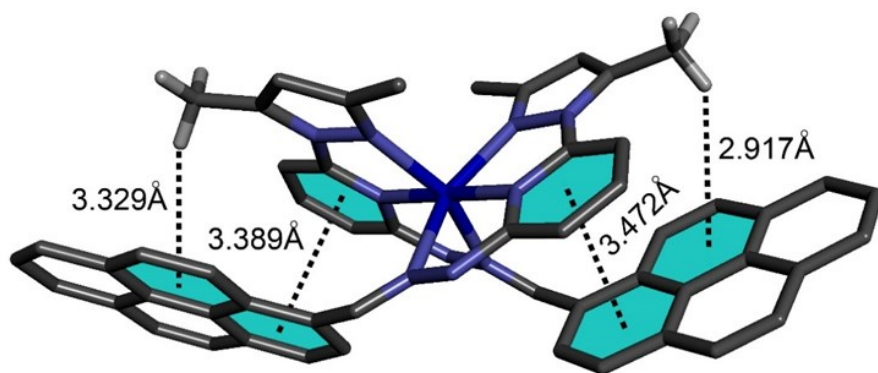

Fig. S10 Intra-molecular non-covalent interactions (C-H... $\pi$  and  $\pi$ ... $\pi$ ) present in Cu<sup>II</sup>L<sub>2</sub> complex.

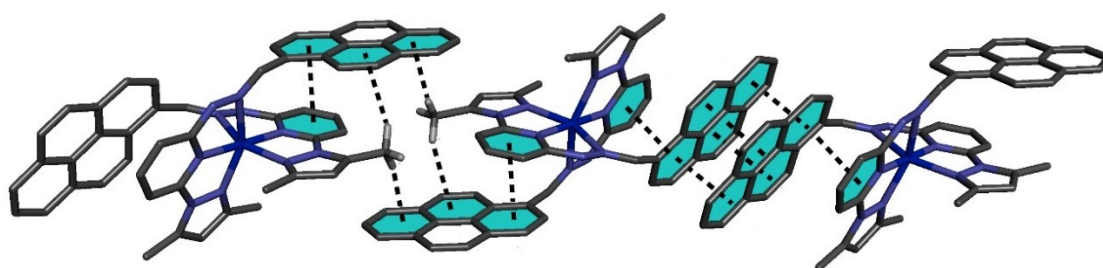

Fig. S11 Inter-molecular non-covalent interactions (C-H... $\pi$  and  $\pi$ ... $\pi$ ) present in Cu<sup>II</sup>L<sub>2</sub> complex.

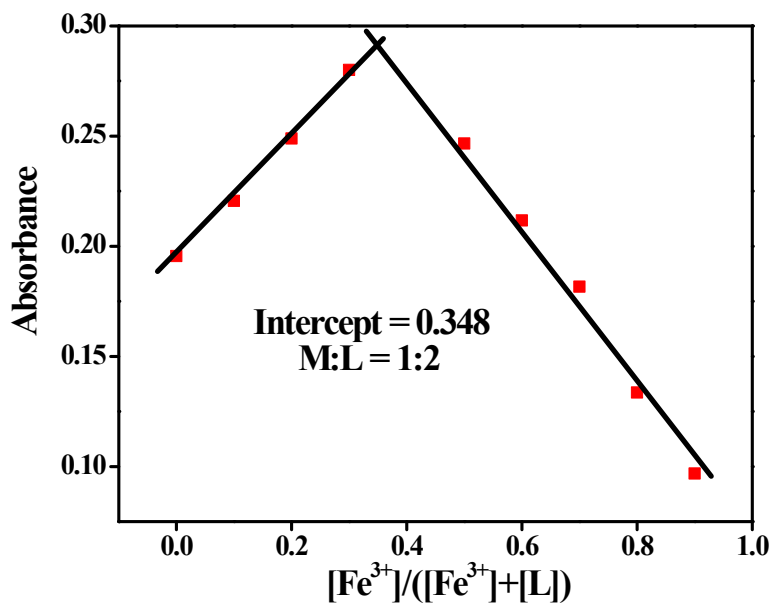

Fig. S12 Job's plot for the binding of L with Fe<sup>3+</sup> absorption intensity at 340 nm in MeOH was plotted as a function of the molar ratio  $[\text{Fe}^{3+}] / ([\text{L}] + [\text{Fe}^{3+}])$ .

**Detection limit.** The detection limit was calculated on the basis of the fluorescence titration. The fluorescence emission intensity of **L** was plotted as a function of concentration of  $\text{Cu}^{2+}$  at 407 nm and the slope and intercept of plot was calculated. Then the detection limit was calculated with the following equation which was found to be very-very low 73 nM (Fig. S13).

$$\text{Detection limit} = 10^{-\left[\frac{\text{slope}}{\text{intercept}}\right]} \quad \text{eqn (2)}$$

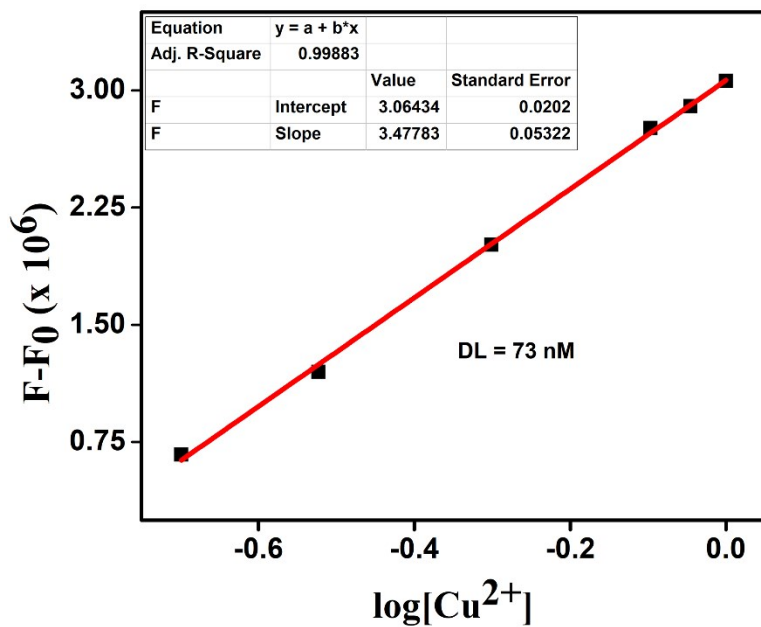

**Fig. S13** Detection limit of **L** for the recognition of  $\text{Cu}^{2+}$  ( $\lambda_{\text{ex}} = 340 \text{ nm}$  and  $\lambda_{\text{em}} = 407 \text{ nm}$ ).
